# Supplementary material for: Variations in Abdominal Aortic Aneurysm Care: A Report From the International Consortium of Vascular Registries
Source: PubMed Central journal article supplement (PMC5147037; doi:10.1161/circulationaha.116.024870), 2016-12-12
Supplement: cir-134-1948-s001.pdf [file cir-134-1948-s001.pdf]

SUPPLEMENTAL MATERIALS

Supplemental Figure 1. Case selection for analysis.

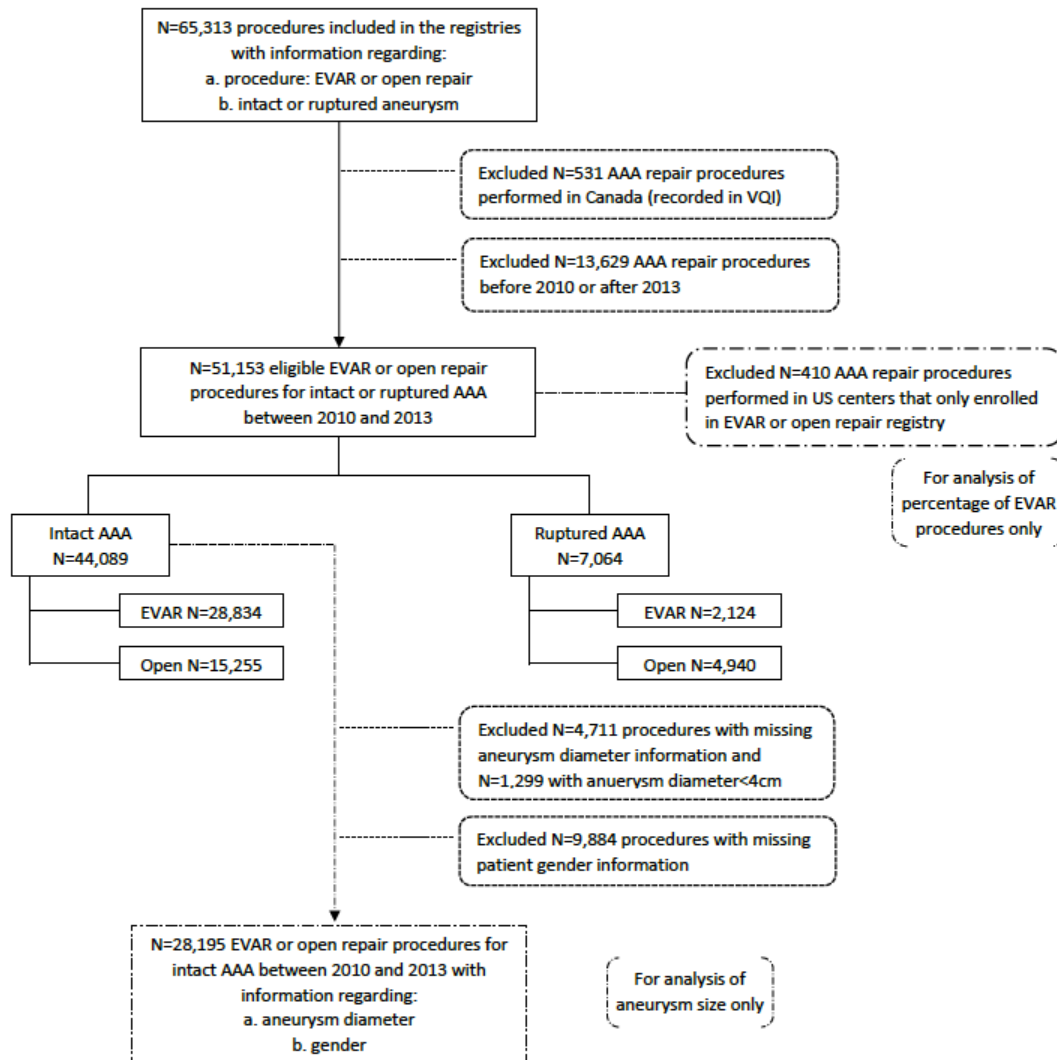

Supplemental Table 1. Number of procedures per year in each registry.

|             | Intact |      |      |      | Ruptured |      |      |      |
|-------------|--------|------|------|------|----------|------|------|------|
|             | 2010   | 2011 | 2012 | 2013 | 2010     | 2011 | 2012 | 2013 |
| Australia   | 1595   | 1631 | 1528 | 1552 | 363      | 381  | 375  | 325  |
| Denmark     | 532    | 596  | 573  | 538  | 212      | 173  | 152  | 211  |
| Finland     | 119    | 117  | 107  | 118  | 44       | 48   | 57   | 43   |
| Germany     | 4144   | 3935 | 3320 | 1173 | 520      | 429  | 382  | 113  |
| Hungary     | 221    | 188  | 194  | 246  | 54       | 39   | 53   | 41   |
| Iceland     | 11     | 25   | 26   | 14   | 11       | 2    | 4    | 4    |
| Norway      | 571    | 496  | 529  | 499  | 121      | 89   | 62   | 62   |
| New Zealand | 230    | 306  | 327  | 351  | 43       | 54   | 71   | 52   |
| Sweden      | 1017   | 1023 | 923  | 930  | 284      | 246  | 250  | 258  |
| Switzerland | 521    | 461  | 558  | 634  | 109      | 70   | 86   | 77   |
| USA         | 955    | 2128 | 3802 | 5325 | 100      | 193  | 325  | 476  |

Supplemental Table 2. Risk factor definitions within countries.

| Country                                      | Diabetes                                        | Cardiac history                                                                                             | Pulmonary disease                                        | Stroke history                                                                                                                                                                                                                                           |
|----------------------------------------------|-------------------------------------------------|-------------------------------------------------------------------------------------------------------------|----------------------------------------------------------|----------------------------------------------------------------------------------------------------------------------------------------------------------------------------------------------------------------------------------------------------------|
| <b>Australia</b>                             | - Biochemically proven, treated or untreated    | - Previous Angina, MI, CABG or PCI<br>- ECG/Stress test                                                     | Not collected                                            | Not collected                                                                                                                                                                                                                                            |
| <b>Denmark</b>                               | - DM(I)<br>- DM(II)                             | - Angina<br>- Previous myocardial infarction<br>- Previous CABG/PCI                                         | - Treatment for lung disease<br>- Severe dyspnea         | - Previous stroke or transient ischemic attack/<br>amaurosis fugax                                                                                                                                                                                       |
| <b>Finland</b>                               | - DM(I)<br>- DM(II)<br>- Diet                   | - Previous MI or CABG, angina pectoris,<br>congestive heart failure, atrial fibrillation                    | - Diagnosis of chronic obstructive<br>pulmonary disease. | - Previous stroke or transient ischemic attack                                                                                                                                                                                                           |
| <b>Germany</b>                               | - DM(I)<br>- DM(II)                             | No heart disease vs. stable vs. unstable                                                                    | - Diagnosis of chronic obstructive<br>pulmonary disease. | History of stroke with or without neurological<br>deficite)                                                                                                                                                                                              |
| <b>Hungary</b>                               | - DM(I)<br>- DM(II)                             | - Previous MI, PCI or CABG, angina<br>pectoris, congetstive heart failure                                   | - Diagnosis of chronic obstructive<br>pulmonary disease. | Not collected                                                                                                                                                                                                                                            |
| <b>Iceland</b>                               | - DM(I)<br>- DM(II)                             | - Previous MI, PCI or CABG<br>- Angina<br>- Congestive heart failure                                        | - Diagnosis of chronic obstructive<br>pulmonary disease. | - Previous ischemic stroke<br>- Previous hemorrhagic stroke                                                                                                                                                                                              |
| <b>New Zealand</b>                           | - Biochemically proven, treated or<br>untreated | - Previous Angina, MI, CABG or PCI<br>- ECG/Stress test                                                     | Not collected                                            | Not collected                                                                                                                                                                                                                                            |
| <b>Norway</b>                                | - DM(I)<br>- DM(II)<br>- Diet                   | - Ischemic heart disease<br>- Previous MI or CABG<br>- Congestive heart failure<br>- Valvular heart disease | - Diagnosis of chronic obstructive<br>pulmonary disease. | - Previous stroke or transient ischemic attack                                                                                                                                                                                                           |
| <b>Sweden</b>                                | - DM(I)<br>- DM(II)                             | - Previous MI, PCI or CABG<br>- Angina<br>- Congestive heart failure                                        | - Diagnosis of chronic obstructive<br>pulmonary disease. | - Previous ischemic stroke<br>- Previous hemorrhagic stroke                                                                                                                                                                                              |
| <b>Switzerland</b>                           | - DM(I)<br>- DM(II)                             | - Angina<br>- Previous myocardial infarction<br>- CABG<br>- No cardiac decompensation                       | - Diagnosis of chronic obstructive<br>pulmonary disease. | Previous stroke                                                                                                                                                                                                                                          |
| <b>USA – Vascular<br/>Quality Initiative</b> | - DM(I)<br>- DM(II)<br>- Diet                   | - Previous MI, PCI or CABG<br>- Angina<br>- Congestive heart failure                                        | - Diagnosis of chronic obstructive<br>pulmonary disease. | Prior CEA or CAS collected in all registries; For<br>Carotid stent and endarterectomy, detailed<br>data regarding the sidedness, location (eye,<br>cortical, vertebrobasilar) and severity are<br>collected, including a pre-op modified Rankin<br>Score |

DM(I): Diabetes mellitus type I, DM(II): Diabetes mellitus type II, MI: Myocardial infarction, CABG: Coronary arterial bypass graft,

Supplemental Table 3. Proportion of women undergoing intact AAA repair at a diameter <5.5cm and <5.2cm in different registries.

|             | <5.5cm, % (95% CI) | <5.2cm, % (95% CI) |
|-------------|--------------------|--------------------|
| Australia   | 38% (35%-41%)      | 26% (23%-28%)      |
| Finland     | 30% (12%-47%)      | 15% (1%-28%)       |
| Germany     | 39% (34%-45%)      | 25% (20%-30%)      |
| Hungary     | 33% (24%-42%)      | 23% (15%-30%)      |
| Iceland     | 15% (0%-35%)       | 0% (0%-21%)        |
| Norway      | 40% (28%-40%)      | 23% (18%-27%)      |
| New Zealand | 34% (28%-40%)      | 17% (13%-23%)      |
| Sweden      | 34% (30%-38%)      | 20% (17%-23%)      |
| Switzerland | 41% (29%-53%)      | 23% (13%-34%)      |
| USA         | 49% (47%-51%)      | 30% (29%-32%)      |
